# Supplementary material for: Identification of M5c regulator-medicated methylation modification patterns for prognosis and immune microenvironment in glioma
Source: publisher site journal article supplement (doi:10.18632/aging.205179), 2023-11-06
Supplement: Supplementary file [file aging-v15i21-205179-supplementary-material-SD3.pdf]

**Supplementary Table 2. Different expression of m5c regulators between cluster 1 and cluster 2.**

| <b>Gene</b> | <b>Cluster 1</b>  | <b>Cluster 2</b>  | <b>logFC</b>          | <b>pValue</b>        |
|-------------|-------------------|-------------------|-----------------------|----------------------|
| ALYREF      | 4.96004073404525  | 5.36418000991667  | 0.113005682972779     | 6.25596851114577E-22 |
| DNMT1       | 3.16902539073529  | 3.35876105713426  | 0.0838899467697152    | 2.62606717504477E-06 |
| DNMT3A      | 2.00262148385747  | 2.21816515840278  | 0.147477025900186     | 1.83864159236044E-10 |
| DNMT3B      | 0.581909419868778 | 0.763365497055556 | 0.391579380008811     | 2.08978753220134E-11 |
| NOP2        | 2.98325979971719  | 3.13413814140278  | 0.071179148489837     | 2.68967655732733E-07 |
| NSUN2       | 3.3024012305362   | 3.30018957917593  | -0.000966511074496745 | 0.740780001003523    |
| NSUN3       | 1.28730601264027  | 1.24975016685185  | -0.0427153257210418   | 0.0255068002429809   |
| NSUN4       | 1.67458119171493  | 1.9381427359537   | 0.210874496503357     | 6.34353266505292E-28 |
| NSUN5       | 2.27724096185068  | 3.17409140560648  | 0.479056719110833     | 3.25938777353229E-56 |
| NSUN6       | 2.62133585067421  | 1.69061105527778  | -0.632757417257666    | 1.1719942893831E-71  |
| NSUN7       | 0.145503581262443 | 1.07336134429167  | 2.88300926981398      | 8.29888406740677E-93 |
| TET2        | 1.75695673890724  | 1.38730541231019  | -0.340793239830725    | 1.29876107820001E-27 |
| TRDMT1      | 0.71347017771267  | 0.640230261712963 | -0.156262257610572    | 5.10987663027065E-07 |
