# Supplementary material for: Identification of M5c regulator-medicated methylation modification patterns for prognosis and immune microenvironment in glioma
Source: publisher site journal article supplement (doi:10.18632/aging.205179), 2023-11-06
Supplement: Supplementary file [file aging-v15i21-205179-supplementary-material-SD5.pdf]

**Supplementary Table 4. The multivariate Cox coefficients of m5c related signature.**

| <b>id</b> | <b>coef</b>        | <b>HR</b>         | <b>HR.95L</b>     | <b>HR.95H</b>     | <b>pvalue</b>         |
|-----------|--------------------|-------------------|-------------------|-------------------|-----------------------|
| SEPT3     | 0.482554120147747  | 1.62020732612917  | 1.24661623593266  | 2.10575773359689  | 0.000308316082083268  |
| CHI3L1    | 0.152505924035992  | 1.16474936209132  | 1.03059345896122  | 1.31636880158307  | 0.0145810851231528    |
| PLBD1     | -0.654897729976483 | 0.51949518865556  | 0.332151476543233 | 0.812506552266219 | 0.00410700239776913   |
| PHYHIPL   | 0.369448460399882  | 1.44693635184989  | 1.04055660172608  | 2.01202395221149  | 0.0280701290239393    |
| SAMD8     | -0.686252231421828 | 0.503459387012789 | 0.289174215128679 | 0.876535116585351 | 0.0152756488909879    |
| RAP1B     | 1.31919027638595   | 3.74039146743468  | 1.99591622851577  | 7.00957692000028  | 0.0000384549796866354 |
| B3GNT5    | -0.435821669489078 | 0.646733047887283 | 0.40645557723035  | 1.0290512879161   | 0.0658978547378556    |
| RER1      | 1.32864693349636   | 3.77593084399798  | 1.68076512666403  | 8.48283529475284  | 0.00129389525860761   |
| PTPN7     | -0.542411766298823 | 0.581344493228143 | 0.291471087299552 | 1.15950238130946  | 0.12360012303279      |
| SLC39A1   | 0.716870434802349  | 2.04801377822253  | 1.09302051566573  | 3.83740321034563  | 0.0252477509172979    |
| MXI1      | -0.507759719971774 | 0.60184236509044  | 0.363043146687824 | 0.997716761002842 | 0.0489729242836353    |
