# Supplementary material for: Identification of M5c regulator-medicated methylation modification patterns for prognosis and immune microenvironment in glioma
Source: Aging (Albany NY). 2023 Nov 6;15(21):12275–95. doi: 10.18632/aging.205179 (PMC10683591; doi:10.18632/aging.205179)
Supplement: Supplementary Table 1 [file aging-15-205179-s002.xlsx]

## Sheet: Sheet1
Supplementary Table 1. Genetic composition of 23 immune signatures.
Activated.B.cell	Activated.CD4.T.cell	Activated.CD8.T.cell	Gamma.delta.T.cell	Immature..B.cell	Regulatory.T.cell	T.follicular.helper.cell	Type.1.T.helper.cell	Type.17.T.helper.cell	Type.2.T.helper.cell	Activated.dendritic.cell	CD56bright.natural.killer.cell	CD56dim.natural.killer.cell	Eosinophil	Immature.dendritic.cell	Macrophage	Mast.cell	MDSC	Monocyte	Natural.killer.cell	Natural.killer.T.cell	Neutrophil	Plasmacytoid.dendritic.cell
ADAM28	AIM2	ADRM1	ACP5	CD22	CCL3L1	B3GAT1	CD70	IL17A	ASB2	ABCD1	ABAT	CYP27A1	GIPR	ACADM	AIF1	ADAMTS3	CCR2	ASGR2	AKT3	BTN2A2	CREB5	CBX6
CD180	BIRC3	AHSA1	AQP9	CYBB	CD72	CDK5R1	TBX21	IL17RA	CSRP2	C1QC	C11orf75	DDX55	KRT18P50	AHCYL1	CCL1	CPA3	CD14	CFP	AXL	CD101	CDA	DAB2
CD79B	BRIP1	C1GALT1C1	BTN3A2	FAM129C	CLEC5A	PDCD1	ADAM8	C2CD4A	DAPK1	CAPG	C5orf15	DYRK2	LRMP	ALDH1A2	CCL14	CMA1	CD2	ASGR1	BST2	CD109	CHST15	DDX17
BLK	CCL20	CCT6B	C1orf54	FCRL1	FOXP3	BCL6	AHCYL2	C2CD4B	DLC1	CCL3L3	CDHR1	RPL37A	FOSB	ALDH3A2	CCL23	CTSG	CD86	CD1D	CDH2	CNPY3	S100A12	HIGD1A
CD19	CCL4	CD37	CARD8	FCRL3	ITGA4	CD200	ALCAM	CA2	DNAJC12	CD207	DCAF12	NOTCH3	RRP12	ALDH9A1	CCL26	ARHGAP15	CXCR4	UPK3A	CRTAM	CNPY4	APOBEC3A	IDH3A
MS4A1	CCL5	CD3D	CCL18	FCRL5	L1CAM	CD83	B3GALNT1	CCDC65	DUSP6	CD302	DYNLL1	AKR7A3	GPR183	ALOX15	CD300LB	CPM	FCGR2A	ACTG1	CSF2RA	CREB1	CASP5	IL3RA
TNFRSF17	CCNB1	CD3E	CD209	FCRLA	LIPA	CD84	BBS12	CEACAM3	GNAI1	ATP5B	GPR137B	GPRC5C	NR4A3	AMT	CNR1	FCN1	FCGR2B	ANXA5	CTSZ	CRTC2	MMP25	MAGED1
IGHM	CCR7	CD3G	CD33	HDAC9	LRP1	FGF2	BST1	IL17C	LAMP3	ATP5L	HCP5	GRIN1	ST3GAL6	ARL1	CNR2	FTL	FCGR3A	ATP6V1B2	CXCL1	CRTC3	HAL	NUCB2
GNG7	DUSP2	CD69	CD36	HLA-DQA1	LRRC42	GPR18	CD151	IL17F	NRP2	ATP6V1A	HDGFRP2	HLA-E	DEPDC5	ATIC	EIF1	HSPA6	FERMT3	CFL1	CYTH1	CSF2	C1orf183	OFD1
MICAL3	ESCO2	CD8A	CDK5	HVCN1	MARCO	CEBPA	CD47	IL17RC	OSBPL1A	BCL2L1	KRT86	PORCN	PDE6C	ATP5A1	EIF4A1	ITGA9	GPSM3	DAZAP2	DAXX	KLRC1	FFAR2	OGT
SPIB	ETS1	CETN3	IL10RB	KIAA0226	MMP12	CECR1	CD48	IL17RE	PDE4B	C1QB	MLST8	PSMC4	PKD2L2	CAPZA1	FPR1	RNASE3	IL18BP	CTBS	DGKH	FUT4	MAK	PDIA4
HLA-DOB	EXO1	CSE1L	KLRF1	NCF1	MNDA	CLEC10A	CD52	IL23A	PHLDA1	SNURF	ELMOD3	UPP1	GPR65	LILRA5	FPR2	S100A4	IL4R	EMR4P	DLL4	ICAM2	CXCR1	SERTAD2
IGKC	EXOC6	GEMIN6	LGALS1	NCF1B	MRC1	CLEC4A	CD53	ILDR1	PLA2G4A	SPCS3	ENTPD5	IL21R	IL5RA	RDX	FRAT2	SIGLEC8	ITGAL	HIVEP2	DPYD	IL32	STEAP4	SIRPA
PNOC	IARS	GNLY	MAPK7	P2RY10	MS4A6A	CSF1R	CD59	LONRF3	RAB27B	CCNA1	FAM119A	KIR2DS1	P2RY14	RRAGD	GPR27	SLC6A4	ITGAM	MARCKSL1	ERBB3	LAMP2	MGAM	TMED2
FCRL2	ITK	GPT2	KLHL7	SP100	PELO	CTSS	CD6	SH2D6	RBMS3	CEACAM8	FAM179A	KIR2DS2	DACH1	TACSTD2	GPR77	PTGS2	PARVG	MBP	F11R	LILRB5	BTNL8	ENG
BACH2	KIF11	GZMA	KRT80	TXNIP	PLEK	DMN	CD68	TNIP2	RNF125	NOS2	CLIC2	KIR2DS5	DAPK2	INPP5F	RNASE2	EGR3	PSAP	MMP15	FAM27A	KLRG1	CXCR2	FCAR
CR2	KNTC1	GZMH	LAMC1	STAP1	PRSS23	DPP4	CD7	ABCA1	TMPRSS3	SRA1	COX7A2L		EMR3	RAB38	MS4A2	PILRA	PTGER2	PNPLA6	FAM49A	HSPA4	TNFRSF10C	IGF1
TCL1A	NUF2	GZMK	LCORL	TAGAP	PTGIR	LRRC32	CD96	ABCB1	GATA3	TNFRSF6B	CREB3L4			PLAU	BASP1		PTGES2	TMBIM6	FASLG	HSPB6	VNN3	ITGA2B
AKNA	PRC1	IL2RB	LMNB1	ZCCHC2	ST8SIA4	MC5R	CFHR3	ADAMTS12	BIRC5	TREM1	CSF1			CSF3R	IGSF6		S100A8	PQBP1	FCGR1A	ISM2		GABARAP
ARHGAP25	PSAT1	LCK	MEIS3P1		STAB1	MICA	CHRM3	ANK1	CDC25C	TREML1	CSNK2A2			SLC18A2	HK3		S100A9	TEX264	FN1	ITIH2		GPX1
CCL21	RGS1	MPZL1	MPL			NCAM1	CLEC7A	ANKRD22	CDC7	RHOA	CSTA			AMPD2	VNN1			IKZF1	FSTL1	KDM4C		KRT23
CD27	RTKN2	NKG7	FABP1			NCR2	COL23A1	B3GALT2	CENPF	SLC25A37	CSTB			CLTB	FES				FUCA1	KIR2DS4		PROK2
CD38	SAMSN1	PIK3IP1	FABP5			NRP1	COL4A4	CAMTA1	CXCR6	TNFSF14	CTPS			C1orf162	NPL				GBP3	KIRREL3		RALB
CLEC17A	SELL	PTRH2	FADD			PDCD1LG2	COL5A3	CCR9	DHFR	TREML4	CTSD				FZD2				GLS2	SDCBP		RETNLB
CLEC9A	TRAT1	TIMM13	MFAP3L			PDCD6	DAB1	CD40	EVI5	VNN2	FST				FAM198B				GRB2	NFATC2IP		RNF141
CLECL1		ZAP70	MINPP1			PRDX1	DLEU7	GPR44	GSTA4	XPO6	GATA2				HNMT				LST1	MICB		SEC14L1
			RPS24			RAE1	DOC2B	IFT80	HELLS	CLEC4C	GMPR				SLC15A3				BCL2	KIR2DL1		SEPX1
			RPS7			RAET1E	EMP1		IL26	TNFAIP2	HDC				CD4				CDC5L	KIR2DL3		EMP3
			RPS9			SIGLEC7	F12		LAIR2	UBD	HEY1				TXNDC3				FGF18	KIR3DL1		CD300LF
			DBNL			SIGLEC9	FURIN			ACTR3	HOXA1				FRMD4A				FUT5	KIR3DL2		ABTB1
			CCL13			TYRO3	GAB3			RAB1A	HS2ST1				CRYBB1				FZR1	NCR1		KLHL21
						CHST12	GATM			SLA	HS3ST1				HRH1				GAGE2	FOSL1		PHRF1
						CLIC3	GFPT2			HLA-DQA2	BCL11B				WNT5B				IGFBP5	TSLP
						IVNS1ABP	GPR25			SIGLEC5	CDH3								KANK2	SLC7A7
						KIR2DL2	GREM2			SLAMF9	MYL6B								LDB3	SPP1
						LGMN	HAVCR1				NAA16									TREM2
							HSD11B1				ClQA									UBASH3A
							HUNK				ClQB									YBX2
							IGF2				CYP27B1									CCDC88A
							RCSD1				EIF3M									CLEC1A
							RYR1													THBD
							SAV1													PDPN
							SELE													VCAM1
							SELP													EMR1
							SH3KBP1
							SIT1
							SLC35B3
							SIGLEC10
							SKAP1
							THUMPD2
							TIGIT
							ZEB2
							ENC1
							FAM134B
							FBXO30
							FCGR2C
							STAC
							LTC4S
							MAN1B1
							MDH1
							MMD
							RGS16
							IL12A
							P2RX5
							CD97
							ITGB4
							ICAM3
							METRNL
							TNFRSF1A
							IRF1
							HTR2B
							CALD1
							MOCOS
							TRAF3IP2
							TLR8
							TRAF1
							DUSP14
