# Supplementary material for: Identification of M5c regulator-medicated methylation modification patterns for prognosis and immune microenvironment in glioma
Source: Aging (Albany NY). 2023 Nov 6;15(21):12275–95. doi: 10.18632/aging.205179 (PMC10683591; doi:10.18632/aging.205179)
Supplement: Supplementary Table 3 [file aging-15-205179-s004.xlsx]

## Sheet: Sheet1
Supplementary Table 3. Hub genes list of MEmidnightblue module.
ATP8A1
TNFRSF12A
ALDH5A1
RNF135
TMEM255B
EMP3
P3H1
METTL7B
GALNT13
APOBEC3G
CLCF1
SLC43A3
PPM1L
CDHR1
COL5A1
LATS2
SERPINH1
SLITRK5
C1R
HFE
IKBIP
ZDHHC22
PPIC
IGFBP2
SH3GL2
CARD16
NOX4
CASP4
COL3A1
AC080038.1
EMILIN1
CD58
PHACTR3
SHISA7
MMP14
CRTAC1
KIF1BP
CAPZA1
S100A4
SELENOF
LDHA
LAMC1
PDIA4
TUBA1C
SQOR
CASP6
SLC16A3
2021-09-03
G0S2
FAM13C
C1RL
S100A11
UPP1
TMSB10
TMEM35B
FAM133A
FRY
GPX7
MAPT
ADPGK
ANXA2
DNM3
GLMP
FMOD
TIMP1
ANXA1
SRPX2
TEAD3
PLOD1
CTSA
IQGAP1
COL1A2
NNMT
CHI3L1
GPX8
APOBEC3D
PCOLCE
TES
PRICKLE3
CD276
FRA10AC1
ARPP21
DSCAML1
TNFRSF1A
PLEK2
SERPINB8
RBMS1
SLC30A7
COL4A2
TEF
TUBB6
TNRC6C
PLAU
PLP2
CNNM2
PTX3
EFEMP2
FNDC3B
PLCB1
RAB32
NTAN1
ZNF25
XKR8
NUCB1
PLBD1
RAB27A
BACE2
PHYHIPL
MYL12A
TUB
AK2
TPM3
NAMPT
SCG3
PLSCR1
SLC10A3
KIAA0040
RDH10
SDF4
REXO2
SERPINA1
CAVIN1
SAMD8
KCNIP3
LGALS1
ABCC3
CASP8
SHC1
SERPING1
ACTN1
OGA
EVA1B
NTNG2
FUT9
DNAJC12
GNG5
JPH3
ADGRE5
ISG20
RAP1B
MYCBP
TMEM71
SEC24D
ANG
CD248
TMOD2
COL6A2
SNAP91
SERPINE1
TMEM214
FKBP9
TNFRSF11B
GSDMD
SOCS3
ZDHHC12
APOBEC3F
RAB34
NALCN
ADAM22
SYDE1
ANXA5
ARAP3
ZMYND11
MCUB
KDELR3
NECTIN2
TRAM1
TNFAIP6
NET1
CALD1
SLC35A2
RAB42
CHI3L2
BCL7A
TMSB4X
PSMC2
OCIAD2
FAM171A1
DUSP26
TPM4
VASN
DDOST
FUCA2
CCSER2
ZYX
CLIC1
CD63
HEXB
REPS2
LIF
SP100
BCL3
FABP5
SH2D4A
ATP6V1G2
YIPF1
TARSL2
FAM114A1
GLA
MSN
ARHGAP18
GDF15
DAP
LSP1
ERI1
EDEM2
CDH20
PIGT
OSMR
PDPN
SLC25A24
CLEC5A
FAM129A
B3GNT5
FLRT1
OSTC
COL1A1
DIRAS3
JPH4
RER1
NCAM1
RBSN
ASB13
HDAC4
ITGA5
RUNDC3A
AMER2
TAGLN2
GNAO1
LOX
CD151
CALU
BCL2L12
MSR1
KIF21B
VIM
APOBEC3C
PLK3
LGALS3
PTPN7
CSMD3
ADAM12
FBXO17
PINLYP
TGIF1
KDELR1
SMIM3
FAIM2
CLASP2
CISH
FAM20C
PDIA3
FSTL1
THRA
VASP
ADPRH
COL4A1
SLC39A1
SPRY1
ELFN2
PLAUR
FN1
DPYD
KCNB1
PQLC3
CADM2
PHETA2
KDELR2
GLB1
CRY2
OMG
CTIF
STEAP3
AKAP6
PYGL
IFNGR2
GABBR1
COLGALT1
RBP1
TMEM230
MXI1
CALR
PLAT
SLC2A10
SPATS2L
TNR
COL5A2
LOXL1
NAP1L3
GUSB
TMED9
TMBIM1
MAP2K3
P4HB
PDLIM1
